# Supplementary material for: The associations between weight-related anthropometrics during childhood and lung function in late childhood: a retrospective cohort study
Source: Springer Nature journal article supplement (doi:10.1186/s12890-017-0567-3), 2018-01-19

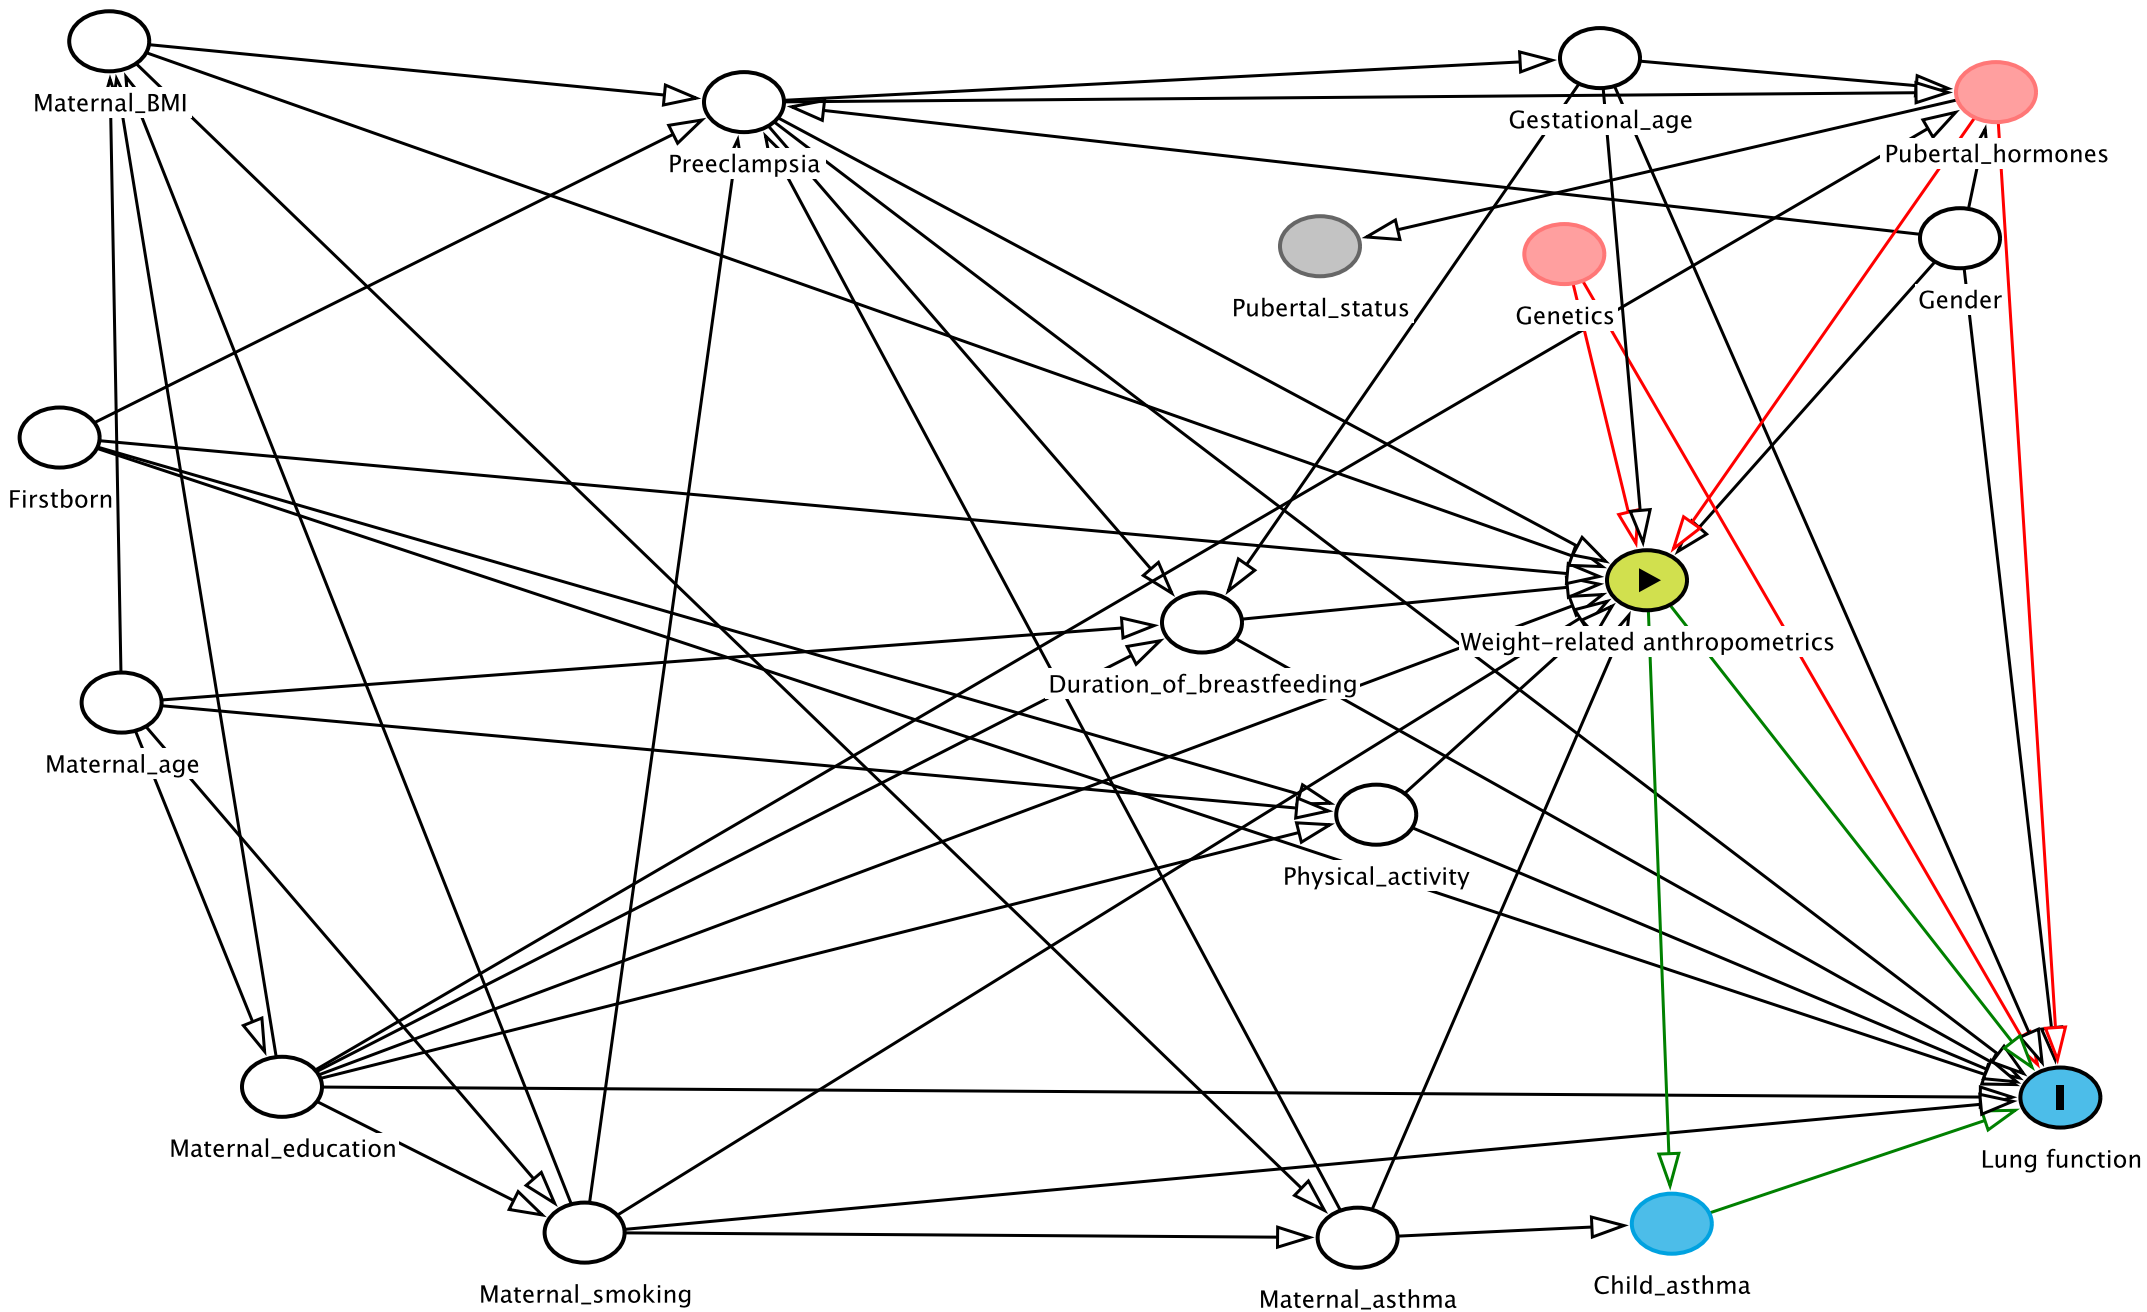

Supplement: MOESM1 [file 15389856]
